# Supplementary material for: A Modified Version of the Direct Sampling Method for Filling Gaps in Landsat 7 and Sentinel 2 Satellite Imagery in the Coastal Area of Rhone River
Source: MDPI journal article supplement (doi:10.3390/rs15215122), 2023-10-26
Supplement: s1 [file s1]

**Table S1. Error metrics and processing time of D1 (average of five repetitions)**

| Gap (%) | Band | MSLE     |          | MSE      |          | R2 (%) |       | Time (sec) |     |
|---------|------|----------|----------|----------|----------|--------|-------|------------|-----|
|         |      | UL       | BL       | UL       | BL       | UL     | BL    | UL         | BL  |
| 8.94    | B01  | 0.000819 | 0.000721 | 76204.2  | 65855.2  | 57.22  | 63.03 | 178        | 341 |
|         | B02  | 0.001008 | 0.000842 | 105389.3 | 85515.1  | 78.58  | 82.62 | 100        | 338 |
|         | B03  | 0.001352 | 0.001119 | 141534.6 | 112977.9 | 84.93  | 87.97 | 157        | 658 |
|         | B04  | 0.001555 | 0.001165 | 254101.2 | 181961.8 | 94.42  | 96.00 | 34         | 332 |
|         | B05  | 0.002124 | 0.001608 | 327544.2 | 245814.7 | 90.44  | 92.83 | 53         | 456 |
|         | B07  | 0.002211 | 0.001782 | 233165.4 | 180367.1 | 85.69  | 88.93 | 121        | 936 |
| 14.23   | B01  | 0.000882 | 0.000805 | 82988.0  | 74704.3  | 51.88  | 56.68 | 201        | 298 |
|         | B02  | 0.001    | 0.000925 | 104195.7 | 95455.5  | 77.88  | 79.74 | 113        | 163 |
|         | B03  | 0.001464 | 0.001385 | 154078.3 | 144699.0 | 82.85  | 83.90 | 185        | 66  |
|         | B04  | 0.001705 | 0.001541 | 271552.2 | 247710.4 | 93.86  | 94.39 | 39         | 43  |
|         | B05  | 0.002375 | 0.002015 | 362255.4 | 308092.6 | 89.07  | 90.70 | 60         | 50  |
|         | B07  | 0.002371 | 0.002066 | 252298.0 | 217271.4 | 83.95  | 86.18 | 130        | 237 |

**Table S2. Error metrics and processing time of D2 (average of five repetitions)**

| Gap (%) | Band | MSLE       |            | MSE        |            | R2 (%) |        | Time (sec) |      |
|---------|------|------------|------------|------------|------------|--------|--------|------------|------|
|         |      | UL         | BL         | UL         | BL         | UL     | BL     | UL         | BL   |
| 11.8    | B01  | 0.00408388 | 0.00282207 | 438362.9   | 304642.5   | 10.23  | 37.61  | 122        | 368  |
|         | B02  | 0.00786246 | 0.00484686 | 923924.2   | 563198.6   | 34.59  | 60.13  | 75         | 447  |
|         | B03  | 0.01369394 | 0.00695814 | 1610000.0  | 794513.2   | 41.01  | 70.86  | 106        | 515  |
|         | B04  | 0.02405667 | 0.01131483 | 3500000.0  | 1710000.0  | 68.26  | 84.47  | 65         | 177  |
|         | B05  | 0.02414083 | 0.01330129 | 3700000.0  | 2030000.0  | 59.59  | 77.88  | 73         | 178  |
|         | B07  | 0.01851584 | 0.00900992 | 2230000.0  | 1070000.0  | 49.36  | 75.82  | 96         | 765  |
| 15.94   | B01  | 0.00099419 | 0.00086711 | 92926.8    | 80212.2    | 58.91  | 64.53  | 355        | 665  |
|         | B02  | 0.00123904 | 0.00106356 | 132173.1   | 110927.5   | 78.47  | 81.93  | 236        | 593  |
|         | B03  | 0.00203394 | 0.00154383 | 221056.0   | 162511.9   | 80.49  | 85.66  | 350        | 833  |
|         | B04  | 0.00211432 | 0.00152794 | 352861.6   | 249824.6   | 93.93  | 95.70  | 88         | 662  |
|         | B05  | 0.00331425 | 0.0023106  | 515155.9   | 358848.4   | 87.81  | 91.51  | 183        | 1057 |
|         | B07  | 0.00319392 | 0.0023426  | 370347.7   | 261378.5   | 81.12  | 86.68  | 735        | 1772 |
| 27.26   | B01  | 0.00337517 | 0.00258382 | 354265.0   | 263746.2   | 16.42  | 37.78  | 302        | 840  |
|         | B02  | 0.00626113 | 0.00454973 | 729560.5   | 520219.5   | 39.77  | 57.05  | 203        | 849  |
|         | B03  | 0.01054103 | 0.00752295 | 1210000.0  | 835046.3   | 47.19  | 63.47  | 300        | 1216 |
|         | B04  | 0.0254916  | 0.01283721 | 3720000.0  | 2110000.0  | 64.05  | 79.61  | 189        | 1792 |
|         | B05  | 0.03406127 | 0.01654293 | 4520000.0  | 2470000.0  | 43.76  | 69.30  | 230        | 1001 |
|         | B07  | 0.02109735 | 0.01182978 | 2290000.0  | 1360000.0  | 38.68  | 63.58  | 677        | 2374 |
| 34.76   | B01  | 0.0048496  | 0.00454749 | 489521.6   | 463896.7   | -11.60 | -5.76  | 142        | 389  |
|         | B02  | 0.01403606 | 0.01426889 | 1430000.0  | 1440000.0  | -19.20 | -20.65 | 126        | 612  |
|         | B03  | 0.02869966 | 0.02901253 | 2790000.0  | 2810000.0  | -21.67 | -22.65 | 226        | 856  |
|         | B04  | 0.11638039 | 0.11762196 | 14000000.0 | 14100000.0 | -31.63 | -32.57 | 105        | 713  |
|         | B05  | 0.09016637 | 0.08992681 | 10300000.0 | 10300000.0 | -26.35 | -26.12 | 275        | 1523 |
|         | B07  | 0.04923798 | 0.04976622 | 4740000.0  | 4780000.0  | -25.10 | -26.12 | 594        | 3079 |

Table S3. Error metrics and processing time of D3 (average of five repetitions)

| Gap (%) | Band | MSLE       |            | MSE      |          | R2 (%) |       | Time (sec) |     |
|---------|------|------------|------------|----------|----------|--------|-------|------------|-----|
|         |      | UL         | BL         | UL       | BL       | UL     | BL    | UL         | BL  |
| 12.48   | B02  | 0.12255339 | 0.12046098 | 84651.5  | 83527.6  | 58.73  | 59.28 | 54         | 283 |
|         | B03  | 0.13037915 | 0.1192476  | 101999.6 | 92811.5  | 60.74  | 64.28 | 41         | 171 |
|         | B04  | 0.37745961 | 0.33745031 | 145443.6 | 130830.6 | 66.12  | 69.53 | 42         | 195 |
|         | B05  | 0.45251313 | 0.3319863  | 157000.4 | 131759.6 | 67.43  | 72.67 | 36         | 88  |
|         | B06  | 0.81401126 | 0.64194433 | 235030.1 | 221400.4 | 58.93  | 61.32 | 39         | 94  |
|         | B07  | 0.80937093 | 0.62268271 | 329637.0 | 202164.1 | 45.45  | 66.55 | 41         | 99  |
|         | B08  | 0.6986143  | 0.80180359 | 347466.6 | 352265.1 | 51.09  | 50.41 | 61         | 138 |
|         | B8A  | 1.53073598 | 0.86830152 | 459092.8 | 187566.5 | 30.34  | 71.54 | 51         | 135 |
|         | B11  | 1.16725258 | 0.88220655 | 313275.8 | 285225.6 | 55.73  | 59.69 | 62         | 150 |
|         | B12  | 1.00409943 | 0.93166344 | 149632.8 | 154193.3 | 73.09  | 72.27 | 57         | 137 |
| 18.57   | B02  | 0.02865261 | 0.02318632 | 20625.7  | 17426.5  | 73.60  | 77.69 | 49         | 480 |
|         | B03  | 0.03428543 | 0.02915849 | 24473.3  | 20223.9  | 76.13  | 80.28 | 43         | 243 |
|         | B04  | 0.09771529 | 0.07266438 | 30085.2  | 23572.1  | 82.90  | 86.60 | 47         | 137 |
|         | B05  | 0.11577821 | 0.07698958 | 31263.6  | 21802.5  | 85.00  | 89.54 | 40         | 88  |
|         | B06  | 0.23693326 | 0.16810123 | 45614.8  | 31461.5  | 79.44  | 85.82 | 48         | 101 |
|         | B07  | 0.2115908  | 0.14893551 | 48854.6  | 34057.2  | 78.93  | 85.31 | 52         | 96  |
|         | B08  | 0.22764618 | 0.15987096 | 57426.9  | 40823.7  | 78.70  | 84.85 | 62         | 138 |
|         | B8A  | 0.39111144 | 0.32696565 | 57735.5  | 43309.2  | 76.45  | 82.33 | 64         | 117 |
|         | B11  | 0.42115833 | 0.33654145 | 48063.5  | 37482.9  | 79.99  | 84.39 | 71         | 99  |
|         | B12  | 0.42030276 | 0.35286849 | 32924.2  | 24067.3  | 82.35  | 87.10 | 61         | 89  |
| 26.63   | B02  | 0.02080259 | 0.01570133 | 14274.0  | 11325.2  | 58.25  | 66.88 | 73         | 200 |
|         | B03  | 0.02318745 | 0.01733353 | 17833.1  | 12842.4  | 63.05  | 73.39 | 62         | 151 |
|         | B04  | 0.08218288 | 0.06765997 | 27619.7  | 20553.1  | 69.02  | 76.94 | 64         | 137 |
|         | B05  | 0.10162893 | 0.07893393 | 25247.5  | 20405.7  | 76.75  | 81.21 | 47         | 97  |
|         | B06  | 0.17374126 | 0.15383257 | 30935.3  | 24595.9  | 74.74  | 79.91 | 54         | 119 |
|         | B07  | 0.15049793 | 0.13299809 | 31358.4  | 24591.0  | 76.00  | 81.18 | 56         | 127 |
|         | B08  | 0.16361742 | 0.12567968 | 41283.1  | 28430.0  | 74.10  | 82.16 | 83         | 168 |
|         | B8A  | 0.21258734 | 0.18751088 | 33033.1  | 26363.2  | 76.97  | 81.62 | 63         | 129 |
|         | B11  | 0.19272303 | 0.15143081 | 36983.0  | 25514.1  | 74.42  | 82.35 | 72         | 113 |
|         | B12  | 0.19791659 | 0.16169831 | 25909.2  | 18562.2  | 74.50  | 81.73 | 69         | 115 |
| 31.07   | B02  | 0.02447128 | 0.01870346 | 16209.9  | 12080.2  | 61.03  | 70.96 | 94         | 275 |
|         | B03  | 0.02848402 | 0.02208853 | 20376.6  | 16145.8  | 63.43  | 71.02 | 82         | 212 |
|         | B04  | 0.09039569 | 0.07338365 | 32866.5  | 25266.8  | 67.05  | 74.67 | 68         | 121 |
|         | B05  | 0.11218274 | 0.09305779 | 37784.6  | 29066.7  | 68.99  | 76.14 | 49         | 77  |
|         | B06  | 0.20470885 | 0.16323703 | 50264.6  | 37746.9  | 63.14  | 72.32 | 53         | 93  |
|         | B07  | 0.19070901 | 0.1489223  | 53452.8  | 40726.6  | 63.48  | 72.17 | 52         | 96  |
|         | B08  | 0.1840667  | 0.13774009 | 61137.3  | 41704.9  | 65.97  | 76.79 | 79         | 139 |
|         | B8A  | 0.28898118 | 0.22703591 | 58761.9  | 41821.4  | 63.52  | 74.04 | 63         | 118 |
|         | B11  | 0.26695263 | 0.20596638 | 55804.4  | 41635.7  | 62.03  | 71.67 | 84         | 145 |
|         | B12  | 0.27023218 | 0.21495287 | 40147.4  | 29472.5  | 59.49  | 70.26 | 81         | 157 |

**Table S4. Reduction in processing time (%) when applying a targeted search for the best replicate in D1**

|       |      | n2    |       |       |       |
|-------|------|-------|-------|-------|-------|
| Gap % | Band | 50    | 100   | 150   | 200   |
| 8.94  | B01  | 43.13 | 60.33 | 80.29 | 86.38 |
|       | B02  | 56.38 | 69.68 | 72.87 | 81.12 |
|       | B03  | 37.03 | 45.9  | 59.42 | 62.08 |
|       | B04  | 56.84 | 61.05 | 71.58 | 80.53 |
|       | B05  | 46.08 | 54.9  | 60.29 | 60.78 |
|       | B07  | 28.81 | 37.29 | 39.55 | 41.81 |
| 14.23 | B01  | 44.46 | 61.56 | 70.36 | 78.66 |
|       | B02  | 57.24 | 71.27 | 74.89 | 82.13 |
|       | B03  | 39.32 | 47.83 | 61.63 | 63.71 |
|       | B04  | 61.24 | 66.03 | 73.68 | 81.34 |
|       | B05  | 44.69 | 59.29 | 64.16 | 64.16 |
|       | B07  | 30.3  | 41.87 | 46.31 | 46.31 |

n2: Number of groups into which the KPs of the TI will be divided; (UL algorithm).

**Table S5. Reduction in processing time (%) when applying a targeted search for the best replicate in D2**

|       |      | n2    |       |       |       |
|-------|------|-------|-------|-------|-------|
| Gap % | Band | 50    | 100   | 150   | 200   |
| 11.8  | B01  | 62.95 | 77.6  | 82.03 | 87.56 |
|       | B02  | 78.39 | 86.65 | 90.04 | 91.1  |
|       | B03  | 68.99 | 78.59 | 84.44 | 85.66 |
|       | B04  | 82.75 | 88.35 | 89.86 | 88.96 |
|       | B05  | 82.2  | 84.92 | 85.73 | 85.19 |
|       | B07  | 65.16 | 75.38 | 80.11 | 79.78 |
| 15.94 | B01  | 46.54 | 62.02 | 69.81 | 78.19 |
|       | B02  | 55.71 | 67.43 | 70.17 | 80.52 |
|       | B03  | 40.93 | 53.36 | 61.29 | 70.63 |
|       | B04  | 57.41 | 61.88 | 65.12 | 74.69 |
|       | B05  | 44.02 | 50.36 | 52.03 | 51.91 |
|       | B07  | 34.4  | 41.95 | 42.64 | 41.95 |
| 27.26 | B01  | 55.74 | 72.02 | 79.33 | 86.25 |
|       | B02  | 68.32 | 80.58 | 83.24 | 88.76 |
|       | B03  | 56.28 | 68.37 | 75.01 | 81.74 |
|       | B04  | 75.19 | 80.78 | 86.37 | 83.54 |
|       | B05  | 58.96 | 65.11 | 68.52 | 68.81 |
|       | B07  | 51.49 | 60.93 | 60.04 | 60.26 |

|       |     |       |       |       |       |
|-------|-----|-------|-------|-------|-------|
| 34.76 | B01 | 75.33 | 89.61 | 92.07 | 93.76 |
|       | B02 | 75.37 | 84.52 | 88.72 | 92.17 |
|       | B03 | 60.97 | 75.14 | 81.89 | 86.43 |
|       | B04 | 39.96 | 65.83 | 68.34 | 76.45 |
|       | B05 | 16.63 | 25.54 | 39.01 | 44.75 |
|       | B07 | 43.41 | 39.08 | 40.41 | 44.12 |

**Table S6. Reduction in processing time (%) when applying a targeted search for the best replicate in D3**

| Gap % | Band | n2    |       |       |       |
|-------|------|-------|-------|-------|-------|
|       |      | 50    | 100   | 150   | 200   |
| 9.29  | B02  | 73.51 | 83.9  | 88.1  | 89.15 |
|       | B03  | 82.7  | 90.49 | 92.49 | 93.92 |
|       | B04  | 91.39 | 94.29 | 95.56 | 95.92 |
|       | B05  | 94.25 | 96.55 | 96.74 | 97.79 |
|       | B06  | 92.59 | 94.49 | 95.79 | 96.29 |
|       | B07  | 92.46 | 94.42 | 95.49 | 96.47 |
|       | B08  | 89.44 | 93.31 | 93.99 | 94.96 |
|       | B8A  | 91.75 | 95.55 | 96.4  | 96.78 |
|       | B11  | 89.11 | 93.4  | 93.73 | 94.06 |
|       | B12  | 88.44 | 93.25 | 92.93 | 95.18 |
| 12.48 | B02  | 82.47 | 89.03 | 91.72 | 93.31 |
|       | B03  | 88.34 | 93.02 | 94.73 | 95.78 |
|       | B04  | 88.86 | 92.89 | 94.21 | 94.91 |
|       | B05  | 89.38 | 94.1  | 95.18 | 96.17 |
|       | B06  | 89.29 | 93.39 | 94.51 | 96    |
|       | B07  | 88.97 | 91.52 | 94.06 | 95.23 |
|       | B08  | 88.34 | 91.02 | 91.55 | 93.69 |
|       | B8A  | 88.03 | 90.64 | 92.82 | 94.67 |
|       | B11  | 80.56 | 90.68 | 89.08 | 90.95 |
|       | B12  | 84.16 | 91.06 | 93.49 | 93.49 |
| 18.57 | B02  | 63.93 | 76.87 | 82.15 | 84.52 |
|       | B03  | 70.44 | 82.06 | 85.74 | 88.68 |
|       | B04  | 75.92 | 86.45 | 87.46 | 89.8  |
|       | B05  | 85.23 | 87.64 | 90.69 | 92.62 |
|       | B06  | 79.68 | 87.63 | 87.81 | 90.64 |
|       | B07  | 80.76 | 86.15 | 88.67 | 88.67 |
|       | B08  | 78.04 | 87.31 | 86.79 | 88.16 |
|       | B8A  | 74.15 | 84.53 | 84.32 | 85.38 |
|       | B11  | 68    | 76.75 | 83    | 82.5  |
|       | B12  | 70.8  | 83.7  | 82.97 | 86.62 |
| 22.66 | B02  | 62.43 | 75.34 | 81.7  | 84.01 |

|       |     |       |       |       |       |
|-------|-----|-------|-------|-------|-------|
|       | B03 | 76.78 | 86.2  | 88.52 | 90.85 |
|       | B04 | 84.77 | 89.97 | 90.1  | 90.76 |
|       | B05 | 87.96 | 87.82 | 91.98 | 93.46 |
|       | B06 | 83.28 | 90.54 | 88.01 | 92.11 |
|       | B07 | 86.89 | 91.13 | 91.39 | 93.32 |
|       | B08 | 81.92 | 87.89 | 85.74 | 89.22 |
|       | B8A | 82.76 | 88.41 | 89    | 89.6  |
|       | B11 | 81.45 | 84.52 | 89.19 | 87.42 |
|       | B12 | 80.93 | 89.22 | 88.23 | 90.71 |
| 26.63 | B02 | 52.53 | 64.4  | 70.68 | 76.44 |
|       | B03 | 59.44 | 71.83 | 77.71 | 81.73 |
|       | B04 | 67.21 | 79.82 | 81.62 | 85.23 |
|       | B05 | 80.04 | 83.75 | 87.28 | 89.58 |
|       | B06 | 74.22 | 79.37 | 84.53 | 87.85 |
|       | B07 | 74.11 | 79.36 | 84.43 | 87.24 |
|       | B08 | 65.83 | 76.88 | 79.17 | 80.63 |
|       | B8A | 66.33 | 79.36 | 82.36 | 85.17 |
|       | B11 | 63.04 | 75.96 | 80.95 | 82.31 |
|       | B12 | 64.94 | 79.87 | 79.87 | 84.42 |
| 31.07 | B02 | 63.28 | 74.14 | 81.38 | 84.57 |
|       | B03 | 70.46 | 80.19 | 84.75 | 87.64 |
|       | B04 | 76.73 | 85.25 | 87.33 | 89.29 |
|       | B05 | 85.76 | 90.09 | 91.69 | 93.05 |
|       | B06 | 83.07 | 86.07 | 89.8  | 91.12 |
|       | B07 | 84.43 | 86.67 | 88.79 | 91.16 |
|       | B08 | 74.31 | 82.68 | 84.85 | 87.16 |
|       | B8A | 77.62 | 83.38 | 87.57 | 90.18 |
|       | B11 | 66.89 | 78.44 | 83.02 | 85.06 |
|       | B12 | 68.31 | 80.34 | 81.53 | 85.08 |
| 38.43 | B02 | 86.74 | 93.62 | 95.54 | 96.33 |
|       | B03 | 92.24 | 96.12 | 97.3  | 97.77 |
|       | B04 | 92.85 | 95.93 | 96.93 | 96.96 |
|       | B05 | 94.39 | 96.77 | 97.79 | 97.45 |
|       | B06 | 93.5  | 95.93 | 97.05 | 97.38 |
|       | B07 | 94.57 | 96.04 | 96.79 | 97.46 |
|       | B08 | 89.41 | 91.21 | 92.83 | 93.32 |
|       | B8A | 88.79 | 90.69 | 93.82 | 94.23 |
|       | B11 | 82.84 | 89.24 | 91.8  | 91.72 |
|       | B12 | 84.73 | 91.2  | 89.82 | 92.49 |

**Table S7. Overall accuracy (%) when imposing a conditional filling path in D1**

| Gap % | Band | minNx     |       |       |       |
|-------|------|-----------|-------|-------|-------|
|       |      | Benchmark | 2     | 4     | 6     |
| 8.94  | B01  | 56.62     | 57.1  | 57.51 | 56.36 |
|       | B02  | 77.78     | 78.26 | 78.65 | 79.19 |
|       | B03  | 84.5      | 84.81 | 84.9  | 84.99 |
|       | B04  | 93.82     | 94.21 | 94.44 | 94.7  |
|       | B05  | 89.48     | 90.2  | 90.43 | 90.37 |
|       | B07  | 84.88     | 85.26 | 85.65 | 86.21 |
| 14.23 | B01  | 48.79     | 51.1  | 52.15 | 52.74 |
|       | B02  | 73.71     | 77.02 | 77.88 | 78.5  |
|       | B03  | 79.27     | 81.33 | 82.85 | 82.29 |
|       | B04  | 91.99     | 93.44 | 93.94 | 94.07 |
|       | B05  | 87.61     | 88.95 | 89.1  | 89.36 |
|       | B07  | 82.16     | 83.68 | 83.89 | 83.8  |

minNx: minimum number of known neighbors to be enforced for a selected UP;  
(UL algorithm).

**Table S8. Overall accuracy (%) when imposing a conditional filling path in D2**

| Gap % | Band | minNx     |        |        |        |
|-------|------|-----------|--------|--------|--------|
|       |      | Benchmark | 2      | 4      | 6      |
| 11.8  | B01  | -17.78    | -1.32  | 10.68  | 5.48   |
|       | B02  | -10.65    | 22.23  | 34.72  | 27.42  |
|       | B03  | -4.95     | 34.6   | 41.09  | 39.19  |
|       | B04  | -7.41     | 67.07  | 68.23  | 68.43  |
|       | B05  | -5.93     | 50.88  | 59.88  | 55.99  |
|       | B07  | -6.87     | 47.46  | 49.13  | 52.73  |
| 15.94 | B01  | 35.93     | 57.54  | 58.94  | 58.04  |
|       | B02  | 54.03     | 77.83  | 78.53  | 78.27  |
|       | B03  | 59.16     | 79.41  | 80.66  | 81.47  |
|       | B04  | 70.01     | 93.71  | 93.95  | 94.35  |
|       | B05  | 64.52     | 87.67  | 87.83  | 88.12  |
|       | B07  | 59.97     | 80.91  | 81.11  | 81.01  |
| 27.26 | B01  | -3.16     | 18.85  | 14.44  | 12.84  |
|       | B02  | 0.43      | 42.54  | 43.4   | 38.23  |
|       | B03  | 0.67      | 49.1   | 47.2   | 46.7   |
|       | B04  | -6.74     | 61.35  | 64.01  | 64.03  |
|       | B05  | -5.3      | 47.39  | 43.87  | 44.55  |
|       | B07  | -4.5      | 40.8   | 38.82  | 38.74  |
| 34.76 | B01  | -27.7     | -12.94 | -12.69 | -10.01 |
|       | B02  | -30.52    | -18.69 | -19.51 | -17.81 |
|       | B03  | -26.67    | -22.84 | -20.79 | -22.3  |
|       | B04  | -33.56    | -31.86 | -29.97 | -29.46 |

|  |     |        |        |        |        |
|--|-----|--------|--------|--------|--------|
|  | B05 | -28.09 | -26.34 | -25.4  | -26.41 |
|  | B07 | -25.52 | -25.99 | -25.42 | -24.62 |

minNx: minimum number of known neighbors to be enforced for a selected UP;  
(UL algorithm).

**Table S9. Overall accuracy (%) when imposing a conditional filling path in D3**

| Gap % | Band | minNx     |        |         |        |
|-------|------|-----------|--------|---------|--------|
|       |      | Benchmark | 2      | 4       | 6      |
| 9.29  | B02  | 25.63     | 59.62  | 62.57   | 67.28  |
|       | B03  | 15.52     | 50.26  | 47.79   | 54.76  |
|       | B04  | -6.17     | 45.37  | 57.84   | 58.01  |
|       | B05  | -34.4     | 17.71  | 23.86   | 24.1   |
|       | B06  | -24.43    | -70.45 | -48.81  | -27.56 |
|       | B07  | -34.47    | -97.63 | -84.35  | -48.5  |
|       | B08  | -30.6     | -83.31 | -63.81  | -5.52  |
|       | B8A  | -31.5     | -116.8 | -117.01 | -88.9  |
|       | B11  | -37.97    | -74.99 | -87.4   | -25.43 |
|       | B12  | -31.44    | -52.85 | -71.48  | -40.56 |
| 12.48 | B02  | -3.2      | 60.36  | 59.33   | 56.96  |
|       | B03  | -7.35     | 56.88  | 60.61   | 45.67  |
|       | B04  | -13.43    | 64.13  | 65.86   | 58.19  |
|       | B05  | -18.25    | 61.91  | 68.23   | 66.07  |
|       | B06  | -20.11    | 44.77  | 58.69   | 46.33  |
|       | B07  | -22.13    | 38.58  | 45.45   | 41.17  |
|       | B08  | -22.85    | 24.38  | 37.37   | 37.37  |
|       | B8A  | -25.1     | 31.09  | 27.61   | 45.94  |
|       | B11  | -19.44    | 46.56  | 56.11   | 47.82  |
|       | B12  | -15.12    | 62.69  | 74.28   | 57.47  |
| 18.57 | B02  | 30.28     | 77.36  | 73.38   | 67.43  |
|       | B03  | 23.57     | 79.55  | 75.95   | 70.5   |
|       | B04  | 10.21     | 84.77  | 83.24   | 78.13  |
|       | B05  | -2.61     | 86.17  | 85.16   | 81.55  |
|       | B06  | -23.41    | 80.29  | 80.72   | 75.53  |
|       | B07  | -30.93    | 79.58  | 78.68   | 77.45  |
|       | B08  | -38.59    | 79.19  | 80.14   | 71.68  |
|       | B8A  | -50.14    | 76.63  | 76.39   | 72.39  |
|       | B11  | -43.27    | 80.31  | 80.16   | 81.14  |
|       | B12  | -16.04    | 83.29  | 82.35   | 84.89  |
| 22.66 | B02  | -181.09   | 23.05  | 46.02   | 47.3   |
|       | B03  | -159.17   | 24.81  | 43.63   | 45.42  |
|       | B04  | -129.62   | 64.47  | 70.7    | 62.6   |
|       | B05  | -121.73   | 62.56  | 68.8    | 64.91  |
|       | B06  | -135.24   | 47.34  | 51.31   | 59.37  |

|       |     |         |        |        |         |
|-------|-----|---------|--------|--------|---------|
|       | B07 | -136.78 | 46.6   | 53.49  | 52.82   |
|       | B08 | -127.78 | 49.53  | 51.28  | 58.8    |
|       | B8A | -135.11 | 41.9   | 46.17  | 51.52   |
|       | B11 | -145.75 | 40.26  | 28.59  | 36.5    |
|       | B12 | -148.38 | 42.79  | 45.5   | 27.11   |
| 26.63 | B02 | -6.91   | 59.19  | 59.24  | 60.88   |
|       | B03 | -14.16  | 62.51  | 63.93  | 65.2    |
|       | B04 | -28.32  | 66.36  | 69.18  | 71.03   |
|       | B05 | -42.5   | 75.61  | 76.96  | 77.97   |
|       | B06 | -65.88  | 73.88  | 74.62  | 76.64   |
|       | B07 | -70.86  | 73.86  | 76.32  | 77.03   |
|       | B08 | -73.25  | 70.1   | 73.93  | 75.11   |
|       | B8A | -81.54  | 74.46  | 76.59  | 75.26   |
|       | B11 | -77.46  | 72.48  | 74.33  | 73.98   |
|       | B12 | -69.87  | 72.44  | 74.5   | 71.3    |
| 31.07 | B02 | -9      | 59.01  | 61.26  | 62.06   |
|       | B03 | -16.26  | 58.94  | 63.43  | 64.72   |
|       | B04 | -31.2   | 63.35  | 67.28  | 66.97   |
|       | B05 | -45.55  | 67.3   | 68.9   | 73.8    |
|       | B06 | -67.05  | 62.37  | 62.6   | 66.58   |
|       | B07 | -74.54  | 63.6   | 62.83  | 66.76   |
|       | B08 | -76.73  | 63.32  | 66.21  | 68.27   |
|       | B8A | -81.43  | 62.1   | 63.38  | 65.94   |
|       | B11 | -95.16  | 61.7   | 62.22  | 63.3    |
|       | B12 | -92.6   | 58.88  | 59.7   | 59.55   |
| 38.43 | B02 | -21.96  | 7.16   | 32.13  | -11.02  |
|       | B03 | -28.19  | 11.84  | 22.44  | -13.97  |
|       | B04 | -39.12  | 27.27  | 24.06  | -6.68   |
|       | B05 | -53.05  | -11.2  | -22.07 | -11.66  |
|       | B06 | -69.98  | -11.32 | -19.79 | -9.32   |
|       | B07 | -76.31  | -26.43 | -85.66 | -143.08 |
|       | B08 | -82.3   | -17.52 | -55.86 | -79.37  |
|       | B8A | -87.77  | -51.66 | -92.97 | -69.34  |
|       | B11 | -80.67  | 10.02  | -40.5  | -9.96   |
|       | B12 | -64.56  | 17.66  | -27.04 | -71.92  |

minNx: minimum number of known neighbors to be enforced for a selected UP; (UL algorithm).
